# Supplementary material for: The new nickel tellurite chloride compound Ni15Te12O34Cl10– synthesis, crystal structure and magnetic properties
Source: Royal Society of Chemistry journal article supplement (doi:10.1039/c2dt32158k), 2012-10-24
Supplement: c2dt32158k.pdf [file c2dt32158k.pdf]

## **Supplementary Materials**

### **The open framework compound Ni<sub>15</sub>Te<sub>12</sub>O<sub>34</sub>Cl<sub>10</sub> - synthesis, crystal structure and magnetic properties**

Dong Zhang, Mats Johnsson, Sven Lidin, and Reinhard K. Kremer

**Table S1** Atomic coordinates and Equivalent Isotropic Displacement Parameters (Å<sup>2</sup>) for Ni<sub>15</sub>Te<sub>12</sub>O<sub>34</sub>Cl<sub>10</sub>.

| Atom  | <i>x</i>    | <i>y</i>    | <i>z</i>    | <i>U</i> (eq) |
|-------|-------------|-------------|-------------|---------------|
| Te(1) | 0.92985(4)  | 0.93140(4)  | -0.18534(4) | 0.00705(11)   |
| Te(2) | 0.89314(4)  | 0.81794(4)  | 0.25306(4)  | 0.00819(11)   |
| Te(3) | 0.72145(4)  | 0.7164(4)   | -0.10159(4) | 0.00692(11)   |
| Te(4) | 0.76483(4)  | 0.20708(4)  | 0.01113(4)  | 0.00670(11)   |
| Te(5) | 0.44335(4)  | -0.04559(4) | 0.38061(4)  | 0.00734(11)   |
| Te(6) | -0.05734(4) | 0.44296(4)  | 0.38305(4)  | 0.00744(11)   |
| Ni(1) | 0.96673(9)  | 0.61832(9)  | 0.00748(18) | 0.00748(18)   |
| Ni(2) | 0.79809(9)  | 0.41108(9)  | 0.16836(8)  | 0.00817(18)   |
| Ni(3) | 0.42521(9)  | 0.78789(9)  | 0.17096(7)  | 0.00797(18)   |
| Ni(4) | ½           | ½           | ½           | 0.0066(2)     |
| Ni(5) | 0.24998(9)  | 0.55773(9)  | 0.25017(8)  | 0.00899(18)   |
| Ni(6) | 0.54480(9)  | 0.25936(9)  | 0.24556(8)  | 0.00967(19)   |
| Ni(7) | 0.62121(9)  | -0.03322(9) | 0.00734(18) | 0.00734(18)   |
| Ni(8) | 0.26769(9)  | 0.26255(9)  | 0.46575(8)  | 0.00946(18)   |
| Cl(1) | 0.60835(18) | 0.59434(18) | 0.27183(15) | 0.0142(3)     |
| Cl(2) | 0.21565(18) | 0.76308(18) | 0.33662(15) | 0.0143(3)     |
| Cl(3) | 0.77090(19) | 0.20744(19) | 0.33189(15) | 0.0168(3)     |
| Cl(4) | 0.4135(2)   | 0.4067(2)   | 0.39368(18) | 0.0211(4)     |
| Cl(5) | 0.11152(18) | 0.13897(18) | 0.45624(17) | 0.0169(4)     |
| O(1)  | 0.0260(5)   | 0.0166(5)   | -0.1342(4)  | 0.0113(10)    |
| O(2)  | 0.7454(5)   | 0.0274(5)   | -0.0820(4)  | 0.0099(9)     |
| O(3)  | 0.0098(5)   | 0.7482(5)   | -0.0831(10) | 0.0113(10)    |
| O(4)  | 0.0680(5)   | 0.6742(5)   | 0.1762(4)   | 0.0100(9)     |
| O(5)  | 0.8013(5)   | 0.8049(5)   | 0.1416(4)   | 0.0108(9)     |
| O(6)  | 0.8429(5)   | 0.5564(5)   | 0.0052(4)   | 0.0095(9)     |
| O(7)  | 0.5719(5)   | 0.8292(5)   | 0.0092(4)   | 0.0102(9)     |
| O(8)  | 0.6276(5)   | 0.6061(5)   | -0.1301(4)  | 0.007(9)      |
| O(9)  | 0.6623(5)   | 0.3691(5)   | 0.1013(4)   | 0.0088(9)     |
| O(10) | 0.6267(5)   | 0.3357(5)   | -0.0995(4)  | 0.0075(9)     |
| O(11) | 0.6463(5)   | 0.1199(5)   | 0.1303(4)   | 0.0106(9)     |
| O(12) | 0.4681(5)   | -0.0664(5)  | 0.2201(4)   | 0.0107(9)     |
| O(13) | 0.6347(5)   | -0.0999(5)  | 0.4030(4)   | 0.0151(10)    |
| O(14) | 0.4080(5)   | 0.1553(5)   | 0.3327(4)   | 0.0109(9)     |
| O(15) | 0.1343(5)   | 0.4337(5)   | 0.3634(5)   | 0.0135(10)    |
| O(16) | -0.0501(5)  | 0.4520(5)   | 0.2195(4)   | 0.0095(9)     |
| O(17) | -0.1390(5)  | 0.6480(5)   | 0.3829(4)   | 0.0115(10)    |

Note. *U*(eq) is defined as one third of the trace of the orthogonalized *U*<sub>ij</sub> tensor.

**Table S2** Selected Bond Lengths (Å) and Results from Bond Valence Sum (BVS) calculations for Ni<sub>15</sub>Te<sub>12</sub>O<sub>34</sub>Cl<sub>10</sub>.

| Atom  | Bond           | Bond distance | Bond valence | Atom        | Bond           | Bond distance | Bond valence |
|-------|----------------|---------------|--------------|-------------|----------------|---------------|--------------|
| Te(1) | Te(1)-O(1)     | 1.875(4)      | 1.4171       | Te(4)       | Te(4)-O(11)    | 1.889(4)      | 1.2685       |
|       | Te(1)-O(3)     | 1.891(5)      | 1.2617       |             | Te(4)-O(9)     | 1.950(4)      | 1.0757       |
|       | Te(1)-O(2)     | 1.939(4)      | 1.1082       |             | Te(4)-O(10)    | 1.959(4)      | 1.050        |
|       | Te(1)-Cl(3) #4 | 2.997(2)      | 0.1837       |             | Te(4)-O(2) #3  | 2.497(4)      | 0.2453       |
|       | Te(1)-Cl(2) #7 | 3.076(2)      | 0.1836       |             |                |               | <u>3.64</u>  |
|       |                |               | <u>4.15</u>  |             |                |               |              |
| Te(2) | Te(2)-O(5)     | 1.872(4)      | 1.3281       | Te(5)       | Te(5)-O(13)    | 1.872(5)      | 1.3281       |
|       | Te(2)-O(4)     | 1.927(4)      | 1.1447       |             | Te(5)-O(12)    | 1.875(4)      | 1.3174       |
|       | Te(2)-O(17) #1 | 2.057(5)      | 0.8056       |             | Te(5)-O(14)    | 1.881(4)      | 1.2962       |
|       | Te(2)-O(1) #2  | 2.200(5)      | 0.5473       |             |                | <u>3.94</u>   |              |
|       |                |               | <u>3.83</u>  | Te(6)       | Te(6)-O(16)    | 1.862(5)      | 1.3645       |
| Te(3) | Te(3)-O(8)     | 1.887(4)      | 1.2754       |             | Te(6)-O(15)    | 1.889(5)      | 1.2685       |
|       | Te(3)-O(7)     | 1.901(4)      | 1.2280       |             | Te(6)-O(17)    | 1.897(4)      | 1.2414       |
|       | Te(3)-O(6)     | 1.911(5)      | 1.1953       | Te(6)-Cl(5) | 2.841(2)       | 0.2800        |              |
|       |                |               | <u>3.70</u>  |             |                | <u>4.15</u>   |              |
| Ni(1) | Ni(1)-O(3)     | 2.046(5)      | 0.3466       | Ni(5)       | Ni(5)-O(4) #8  | 2.007(5)      | 0.3852       |
|       | Ni(1)-O(16) #1 | 2.053(5)      | 0.3401       |             | Ni(5)-O(15)    | 2.085(5)      | 0.3120       |
|       | Ni(1)-O(4)     | 2.074(4)      | 0.3214       |             | Ni(5)-O(10) #6 | 2.199(4)      | 0.2292       |
|       | Ni(1)-O(5)     | 2.080(4)      | 0.3162       |             | Ni(5)-O(8) #6  | 2.200(4)      | 0.2286       |
|       | Ni(1)-O(6)     | 2.100(4)      | 0.2996       |             | Ni(5)-Cl(4)    | 2.418(2)      | 0.3411       |
|       | Ni(1)-O(6) #4  | 2.194(4)      | 0.2324       |             | Ni(5)-Cl(2)    | 2.4408(17)    | 0.3207       |
|       |                |               | <u>1.86</u>  |             |                | <u>1.82</u>   |              |
| Ni(2) | Ni(2)-O(9)     | 2.027(4)      | 0.3649       | Ni(6)       | Ni(6)-O(11)    | 1.980(4)      | 0.4143       |
|       | Ni(2)-O(16) #1 | 2.059(5)      | 0.3347       |             | Ni(6)-O(14)    | 2.031(4)      | 0.3610       |
|       | Ni(2)-O(3) #4  | 2.128(5)      | 0.2777       |             | Ni(6)-O(9)     | 2.145(4)      | 0.2653       |
|       | Ni(2)-O(6)     | 2.148(5)      | 0.2631       |             | Ni(6)-O(8) #6  | 2.234(5)      | 0.2086       |
|       | Ni(2)-Cl(1)    | 2.349(2)      | 0.4110       |             | Ni(6)-Cl(4)    | 2.3339(19)    | 0.4281       |
|       | Ni(2)-Cl(3)    | 2.473(2)      | 0.2940       |             | Ni(6)-Cl(3)    | 2.577(2)      | 0.0825       |
|       |                |               | <u>1.95</u>  |             |                | <u>1.76</u>   |              |
| Ni(3) | Ni(3)-O(12) #5 | 2.000(4)      | 0.3925       | Ni(7)       | Ni(7)-O(11)    | 1.981(4)      | 0.4132       |
|       | Ni(3)-O(10) #6 | 2.015(4)      | 0.3769       |             | Ni(7)-O(12)    | 2.013(4)      | 0.3790       |
|       | Ni(3)-O(7)     | 2.135(5)      | 0.2725       |             | Ni(7)-O(5) #3  | 2.024(5)      | 0.3679       |
|       | Ni(3)-O(2) #7  | 2.175(5)      | 0.2446       |             | Ni(7)-O(2) #3  | 2.060(5)      | 0.3338       |
|       | Ni(3)-Cl(1)    | 2.3469(19)    | 0.4133       |             | Ni(7)-O(7) #3  | 2.106(4)      | 0.2948       |
|       | Ni(3)-Cl(2)    | 2.5210(18)    | 0.096        |             | Ni(7)-O(7) #6  | 2.375(5)      | 0.1425       |
|       |                |               | <u>1.80</u>  |             |                | <u>1.93</u>   |              |
| Ni(4) | Ni(4)-O(10) #6 | 2.050(4)      | 0.3429       | Ni(8)       | Ni(8)-O(14)    | 2.000(5)      | 0.3925       |

|      |               |          |             |       |                 |            |             |
|------|---------------|----------|-------------|-------|-----------------|------------|-------------|
|      | Ni(4)-O(10)   | 2.050(4) | 0.3429      |       | Ni(8)-O(15)     | 2.002(5)   | 0.3904      |
|      | Ni(4)-O(9) #6 | 2.054(5) | 0.3392      |       | Ni(8)-O(13) #9  | 2.022(5)   | 0.3699      |
|      | Ni(4)-O(9)    | 2.054(5) | 0.3392      |       | Ni(8)-O(17) #10 | 2.058(4)   | 0.3356      |
|      | Ni(4)-O(8)    | 2.116(4) | 0.2869      |       | Ni(8)-Cl(4)     | 2.4041(19) | 0.3541      |
|      | Ni(4)-O(8) #6 | 2.116(4) | 0.2869      |       | Ni(8)-Cl(5)     | 2.5007(18) | 0.1014      |
|      |               |          | <u>1.94</u> |       |                 |            | <u>1.94</u> |
|      |               |          |             | O(10) | Te(4)-O(10)     | 1.959(4)   | 1.050       |
|      |               |          |             |       | Ni(3)-O(10) #6  | 2.015(4)   | 0.3769      |
| O(1) | Te(1)-O(1)    | 1.875(4) | 1.4171      |       | Ni(4)-O(10)     | 2.050(4)   | 0.3429      |
|      | Te(2)-O(1) #2 | 2.200(5) | 0.5473      |       | Ni(5)-O(10) #6  | 2.199(4)   | 0.2292      |
|      |               |          | <u>1.96</u> |       |                 |            | <u>2.00</u> |
| O(2) | Te(1)-O(2)    | 1.939(4) | 1.1082      |       |                 |            |             |
|      | Te(4)-O(2) #3 | 2.497(4) | 0.2453      | O(11) | Te(4)-O(11)     | 1.889(4)   | 1.2685      |
|      | Ni(3)-O(2) #7 | 2.175(5) | 0.2446      |       | Ni(6)-O(11)     | 1.980(4)   | 0.4143      |
|      | Ni(7)-O(2) #3 | 2.060(5) | 0.3338      |       | Ni(7)-O(11)     | 1.981(4)   | 0.4132      |
|      |               |          | <u>1.93</u> |       |                 |            | <u>2.09</u> |
| O(3) | Te(1)-O(3)    | 1.891(5) | 1.2617      | O(12) | Te(5)-O(12)     | 1.875(4)   | 1.3174      |
|      | Ni(1)-O(3)    | 2.046(5) | 0.3466      |       | Ni(3)-O(12) #5  | 2.000(4)   | 0.3925      |
|      | Ni(2)-O(3) #4 | 2.128(5) | 0.2777      |       | Ni(7)-O(12)     | 2.013(4)   | 0.3790      |
|      |               |          | <u>1.89</u> |       |                 |            | <u>2.09</u> |
| O(4) | Te(2)-O(4)    | 1.927(4) | 1.1447      |       |                 |            |             |
|      | Ni(1)-O(4)    | 2.074(4) | 0.3214      | O(13) | Te(5)-O(13)     | 1.872(5)   | 1.3281      |
|      | Ni(5)-O(4) #8 | 2.007(5) | 0.3852      |       | Ni(8)-O(13) #9  | 2.022(5)   | 0.3699      |
|      |               |          | <u>1.85</u> |       |                 |            | <u>1.70</u> |
| O(5) | Te(2)-O(5)    | 1.872(4) | 1.3281      | O(14) | Te(5)-O(14)     | 1.881(4)   | 1.2962      |
|      | Ni(1)-O(5)    | 2.080(4) | 0.3162      |       | Ni(6)-O(14)     | 2.031(4)   | 0.3610      |
|      | Ni(7)-O(5) #3 | 2.024(5) | 0.3679      |       | Ni(8)-O(14)     | 2.000(5)   | 0.3925      |
|      |               |          | <u>2.01</u> |       |                 |            | <u>2.05</u> |
| O(6) | Te(3)-O(6)    | 1.911(5) | 1.1953      |       |                 |            |             |
|      | Ni(1)-O(6)    | 2.100(4) | 0.2996      | O(15) | Te(6)-O(15)     | 1.889(5)   | 1.2685      |
|      | Ni(1)-O(6) #4 | 2.194(4) | 0.2324      |       | Ni(5)-O(15)     | 2.085(5)   | 0.3120      |
|      | Ni(2)-O(6)    | 2.148(5) | 0.2631      |       | Ni(8)-O(15)     | 2.002(5)   | 0.3904      |
|      |               |          | <u>1.99</u> |       |                 |            | <u>1.97</u> |
| O(7) | Te(3)-O(7)    | 1.901(4) | 1.2280      |       |                 |            |             |
|      | Ni(3)-O(7)    | 2.135(5) | 0.2725      | O(16) | Te(6)-O(16)     | 1.862(5)   | 1.3645      |
|      | Ni(7)-O(7) #3 | 2.106(4) | 0.2948      |       | Ni(1)-O(16) #1  | 2.053(5)   | 0.3401      |
|      | Ni(7)-O(7) #6 | 2.375(5) | 0.1425      |       | Ni(2)-O(16) #1  | 2.059(5)   | 0.3347      |
|      |               |          | <u>1.94</u> |       |                 |            | <u>2.04</u> |

|       |                |            |             |       |                 |            |             |
|-------|----------------|------------|-------------|-------|-----------------|------------|-------------|
| O(8)  | Te(3)-O(8)     | 1.887(4)   | 1.2754      |       |                 |            |             |
|       | Ni(4)-O(8)     | 2.116(4)   | 0.2869      | O(17) | Te(2)-O(17) #1  | 2.057(5)   | 0.8056      |
|       | Ni(5)-O(8) #6  | 2.200(4)   | 0.2286      |       | Te(6)-O(17)     | 1.897(4)   | 1.2414      |
|       | Ni(6)-O(8) #6  | 2.234(5)   | 0.2086      |       | Ni(8)-O(17) #10 | 2.058(4)   | 0.3356      |
|       |                |            | <u>2.00</u> |       |                 |            | <u>2.38</u> |
| O(9)  | Te(4)-O(9)     | 1.950(4)   | 1.0757      |       |                 |            |             |
|       | Ni(2)-O(9)     | 2.027(4)   | 0.3649      |       |                 |            |             |
|       | Ni(4)-O(9)     | 2.054(5)   | 0.3392      |       |                 |            |             |
|       | Ni(6)-O(9)     | 2.145(4)   | 0.2653      |       |                 |            |             |
|       |                |            | <u>2.05</u> |       |                 |            |             |
|       |                |            |             | Cl(4) | Ni(5)-Cl(4)     | 2.418(2)   | 0.3411      |
| Cl(1) | Ni(2)-Cl(1)    | 2.349(2)   | 0.4110      |       | Ni(6)-Cl(4)     | 2.3339(19) | 0.4281      |
|       | Ni(3)-Cl(1)    | 2.3469(19) | 0.4133      |       | Ni(8)-Cl(4)     | 2.4041(19) | 0.3541      |
|       |                |            | <u>0.83</u> |       |                 |            | <u>1.12</u> |
| Cl(2) | Te(1)-Cl(2) #7 | 3.076(2)   | 0.1836      |       |                 |            |             |
|       | Ni(3)-Cl(2)    | 2.5210(18) | 0.096       | Cl(5) | Te(6)-Cl(5)     | 2.841(2)   | 0.2800      |
|       | Ni(5)-Cl(2)    | 2.4408(17) | 0.3207      |       | Ni(8)-Cl(5)     | 2.5007(18) | 0.1014      |
|       |                |            | <u>0.60</u> |       |                 |            | <u>0.38</u> |
| Cl(3) | Te(1)-Cl(3) #4 | 2.997(2)   | 0.1837      |       |                 |            |             |
|       | Ni(2)-Cl(3)    | 2.473(2)   | 0.2940      |       |                 |            |             |
|       | Ni(6)-Cl(3)    | 2.577(2)   | 0.0825      |       |                 |            |             |
|       |                |            | <u>0.56</u> |       |                 |            |             |

*Note.* Symmetry transformations used to generate equivalent atoms:

|    |              |     |               |    |              |    |               |
|----|--------------|-----|---------------|----|--------------|----|---------------|
| #1 | 1+x, y, z    | #2  | 2-x, 2-y, -z  | #3 | x, y-1, z    | #4 | -x+2, 1-y, -z |
| #5 | x, y+1, z    | #6  | -x+1, 1-y, -z | #7 | 1-x, 2-y, -z | #8 | x-1, y, z     |
| #9 | 1-x, -y, 1-z | #10 | -x, 1-y, 1-z  |    |              |    |               |

Bond valence sum (BVS) calculations according to Brown and Altermatt [A].

The  $r_0$  values used are Te-O: 1.977, Te-Cl: 2.37, Ni-O: 1.654, Ni-Cl: 2.02 [B]

**Table S3** Selected Bond Angles (°) for Ni<sub>15</sub>Te<sub>12</sub>O<sub>34</sub>Cl<sub>10</sub>.

|                        |            |                       |          |
|------------------------|------------|-----------------------|----------|
| O(1)-Te(1)-O(3)        | 93.3(2)    | O(2)#7-Ni(3)-Cl(2)    | 85.2(1)  |
| O(1)-Te(1)-O(2)        | 92.1(2)    | Cl(1)-Ni(3)-Cl(2)     | 94.4(6)  |
| O(3)-Te(1)-O(2)        | 101.1(2)   | O(10)#6-Ni(4)-O(10)   | 180.0(2) |
| O(1)-Te(1)-Cl(3) #4    | 82.36(16)  | O(10)-Ni(4)-O(9) #6   | 101.4(2) |
| O(3)-Te(1)-Cl(3) #4    | 78.31(16)  | O(10)-Ni(4)-O(9)      | 78.6(2)  |
| O(2)-Te(1)-Cl(3) #4    | 174.28(16) | O(10)#6-Ni(4)-O(9) #6 | 78.6(2)  |
| O(1)-Te(1)-Cl(2) #7    | 86.08(17)  | O(10)#6-Ni(4)-O(9)    | 101.4(2) |
| O(3)-Te(1)-Cl(2) #7    | 176.13(16) | O(9)#6-Ni(4)-O(9)     | 180.0(3) |
| O(2)-Te(1)-Cl(2) #7    | 75.21(16)  | O(10)#6-Ni(4)-O(8)    | 98.6(2)  |
| Cl(3)#4-Te(1)-Cl(2) #7 | 105.40(5)  | O(10)-Ni(4)-O(8)      | 81.4(2)  |
| O(5)-Te(2)-O(4)        | 84.9(2)    | O(9)-Ni(4)-O(8)       | 95.0(2)  |
| O(5)-Te(2)-O(17) #1    | 95.2(2)    | O(9)#6-Ni(4)-O(8)     | 85.0(2)  |
| O(4)-Te(2)-O(17) #1    | 88.2(2)    | O(10)#6-Ni(4)-O(8) #6 | 81.4(2)  |
| O(5)-Te(2)-O(1) #2     | 97.0(2)    | O(10)-Ni(4)-O(8) #6   | 98.6(2)  |
| O(4)-Te(2)-O(1) #2     | 86.3(2)    | O(9)-Ni(4)-O(8) #6    | 85.0(2)  |
| O(17)#3-Te(2)-O(1) #2  | 166.2(2)   | O(9)#6-Ni(4)-O(8) #6  | 95.0(2)  |
| O(8)-Te(3)-O(7)        | 101.9(2)   | O(8)-Ni(4)-O(8) #6    | 180.0(2) |
| O(8)-Te(3)-O(6)        | 97.7(2)    | O(4)#8-Ni(5)-O(15)    | 85.3(2)  |
| O(7)-Te(3)-O(6)        | 101.7(2)   | O(4)#8-Ni(5)-O(10) #6 | 90.5(2)  |
| O(11)-Te(4)-O(9)       | 84.2(2)    | O(15)-Ni(5)-O(10) #6  | 167.2(2) |
| O(11)-Te(4)-O(10)      | 100.3(2)   | O(4)#8-Ni(5)-O(8) #6  | 99.7(2)  |
| O(9)-Te(4)-O(10)       | 83.4(2)    | O(15)-Ni(5)-O(8) #6   | 92.5(2)  |
| O(11)-Te(4)-O(2) #3    | 73.4(2)    | O(10)#6-Ni(5)-O(8) #6 | 76.3(2)  |
| O(9)-Te(4)-O(2) #3     | 147.2(2)   | O(4)#8-Ni(5)-Cl(4)    | 162.2(1) |
| O(10)-Te(4)-O(2) #3    | 77.6(2)    | O(15)-Ni(5)-Cl(4)     | 79.2(1)  |
| O(13)-Te(5)-O(12)      | 104.1(2)   | O(10)#6-Ni(5)-Cl(4)   | 106.5(1) |
| O(13)-Te(5)-O(14)      | 93.4(2)    | O(8)#6-Ni(5)-Cl(4)    | 89.7(1)  |
| O(12)-Te(5)-O(14)      | 92.0(2)    | O(4)#8-Ni(5)-Cl(2)    | 92.7(1)  |
| O(16)-Te(6)-O(15)      | 95.9(2)    | O(15)-Ni(5)-Cl(2)     | 112.3(2) |
| O(16)-Te(6)-O(17)      | 98.2(2)    | O(10)#6-Ni(5)-Cl(2)   | 79.8(1)  |
| O(15)-Te(6)-O(17)      | 90.8(2)    | O(8)#6-Ni(5)-Cl(2)    | 153.1(1) |
| O(16)-Te(6)-Cl(5)      | 101.3(2)   | Cl(4)-Ni(5)-Cl(2)     | 85.3(7)  |
| O(15)-Te(6)-Cl(5)      | 76.5(2)    | O(11)-Ni(6)-O(14)     | 91.0(2)  |
| O(17)-Te(6)-Cl(5)      | 157.70(2)  | O(11)-Ni(6)-O(9)      | 77.1(2)  |
| O(3)-Ni(1)-O(16) #1    | 167.7(2)   | O(14)-Ni(6)-O(9)      | 160.2(2) |
| O(3)-Ni(1)-O(4)        | 96.1(2)    | O(11)-Ni(6)-O(8) #6   | 89.7(2)  |
| O(16)#1-Ni(1)-O(4)     | 90.0(2)    | O(14)-Ni(6)-O(8) #6   | 84.2(2)  |
| O(3)-Ni(1)-O(5)        | 89.3(2)    | O(9)-Ni(6)-O(8) #6    | 80.1(2)  |
| O(16)#1-Ni(1)-O(5)     | 102.6(2)   | O(11)-Ni(6)-Cl(4)     | 173.9(1) |
| O(4)-Ni(1)-O(5)        | 76.2(2)    | O(14)-Ni(6)-Cl(4)     | 83.1(1)  |
| O(3)-Ni(1)-O(6)        | 91.8(2)    | O(9)-Ni(6)-Cl(4)      | 109.0(1) |
| O(16)#1-Ni(1)-O(6)     | 83.1(2)    | O(8)#6-Ni(6)-Cl(4)    | 91.0(1)  |
| O(4)-Ni(1)-O(6)        | 171.0(2)   | O(11)-Ni(6)-Cl(3)     | 97.5(2)  |
| O(5)-Ni(1)-O(6)        | 99.7(2)    | O(14)-Ni(6)-Cl(3)     | 120.7(1) |
| O(3)-Ni(1)-O(6) #4     | 83.2(2)    | O(9)-Ni(6)-Cl(3)      | 77.0(1)  |
| O(16)#1-Ni(1)-O(6) #4  | 85.2(2)    | O(8)#6-Ni(6)-Cl(3)    | 153.7(1) |
| O(4)-Ni(1)-O(6) #4     | 100.4(2)   | Cl(4)-Ni(6)-Cl(3)     | 84.5(6)  |
| O(5)-Ni(1)-O(6) #4     | 171.4(2)   | O(11)-Ni(7)-O(12)     | 98.4(2)  |
| O(6)-Ni(1)-O(6) #4     | 84.8(2)    | O(11)-Ni(7)-O(5) #3   | 92.6(2)  |

|                        |          |                         |          |
|------------------------|----------|-------------------------|----------|
| O(9)-Ni(2)-O(16) #1    | 174.2(2) | O(12)-Ni(7)-O(5) #3     | 98.0(2)  |
| O(9)-Ni(2)-O(3) #4     | 92.8(2)  | O(11)-Ni(7)-O(2) #3     | 82.5(2)  |
| O(16)#1-Ni(2)-O(3) #4  | 82.8(2)  | O(12)-Ni(7)-O(2) #3     | 169.5(2) |
| O(9)-Ni(2)-O(6)        | 93.9(2)  | O(5)#3-Ni(7)-O(2) #3    | 92.5(2)  |
| O(16)#1-Ni(2)-O(6)     | 81.8(2)  | O(11)-Ni(7)-O(7) #3     | 171.8(2) |
| O(3)#4-Ni(2)-O(6)      | 82.5(2)  | O(12)-Ni(7)-O(7) #3     | 82.1(2)  |
| O(9)-Ni(2)-Cl(1)       | 95.1(1)  | O(5)#3-Ni(7)-O(7) #3    | 95.4(2)  |
| O(16)#1-Ni(2)-Cl(1)    | 89.3(1)  | O(2)#3-Ni(7)-O(7) #3    | 95.6(2)  |
| O(3)#4-Ni(2)-Cl(1)     | 172.1(1) | O(11)-Ni(7)-O(7) #6     | 83.5(2)  |
| O(6)-Ni(2)-Cl(1)       | 96.6(1)  | O(12)-Ni(7)-O(7) #6     | 88.0(2)  |
| O(9)-Ni(2)-Cl(3)       | 81.6(1)  | O(5)#3-Ni(7)-O(7) #6    | 173.4(2) |
| O(16)#1-Ni(2)-Cl(3)    | 101.9(1) | O(2)#3-Ni(7)-O(7) #6    | 81.7(2)  |
| O(3)#4-Ni(2)-Cl(3)     | 87.9(1)  | O(7)#3-Ni(7)-O(7) #6    | 88.3(2)  |
| O(6)-Ni(2)-Cl(3)       | 169.1(1) | O(14)-Ni(8)-O(15)       | 98.1(2)  |
| Cl(1)-Ni(2)-Cl(3)      | 93.6(6)  | O(14)-Ni(8)-O(13) #9    | 92.8(2)  |
| O(12)#5-Ni(3)-O(10) #6 | 171.4(2) | O(15)-Ni(8)-O(13) #9    | 168.1(2) |
| O(12)#5-Ni(3)-O(7)     | 81.6(2)  | O(14)-Ni(8)-O(17) #10   | 172.9(2) |
| O(10)#6-Ni(3)-O(7)     | 93.3(2)  | O(15)-Ni(8)-O(17) #10   | 89.0(2)  |
| O(12)#5-Ni(3)-O(2) #7  | 88.0(2)  | O(13)#9-Ni(8)-O(17) #10 | 80.2(2)  |
| O(10)#6-Ni(3)-O(2) #7  | 84.6(2)  | O(14)-Ni(8)-Cl(4)       | 81.9(1)  |
| O(7)-Ni(3)-O(2) #7     | 84.9(2)  | O(15)-Ni(8)-Cl(4)       | 81.2(1)  |
| O(12)#5-Ni(3)-Cl(1)    | 90.0(1)  | O(13)#9-Ni(8)-Cl(4)     | 105.4(2) |
| O(10)#6-Ni(3)-Cl(1)    | 97.4(1)  | O(17)#10-Ni(8)-Cl(4)    | 99.3(1)  |
| O(7)-Ni(3)-Cl(1)       | 95.7(1)  | O(14)-Ni(8)-Cl(5)       | 84.7(1)  |
| O(2)#7-Ni(3)-Cl(1)     | 177.8(1) | O(15)-Ni(8)-Cl(5)       | 83.6(1)  |
| O(12)#5-Ni(3)-Cl(2)    | 102.4(1) | O(13)#9-Ni(8)-Cl(5)     | 92.6(2)  |
| O(10)#6-Ni(3)-Cl(2)    | 81.4(1)  | O(17)#10-Ni(8)-Cl(5)    | 96.1(1)  |
| O(7)-Ni(3)-Cl(2)       | 169.2(1) | Cl(4)-Ni(8)-Cl(5)       | 158.0(7) |

Note. Symmetry transformations used to generate equivalent atoms:

|                   |                    |                   |                    |
|-------------------|--------------------|-------------------|--------------------|
| #1 $1+x, y, z$    | #2 $2-x, 2-y, -z$  | #3 $x, y-1, z$    | #4 $-x+2, 1-y, -z$ |
| #5 $x, y+1, z$    | #6 $-x+1, 1-y, -z$ | #7 $1-x, 2-y, -z$ | #8 $x-1, y, z$     |
| #9 $1-x, -y, 1-z$ | #10 $-x, 1-y, 1-z$ |                   |                    |

## References

- [A] I.D. Brown, D. Altermatt, *Acta Cryst.*, 1985, **B41**, 244–247.  
[B] N.E. Brese, M.O’Keefe, *Acta Cryst B* 47 (1991) 192-197.
